# Supplementary material
Source: publisher site journal article supplement (https://www.dovepress.com/article/494126)
Supplement: Supplementary file 1 [file get_supplementary_file.php]

Supplementary tables

Table S1 Sequences of primers used quantitative real-time PCR.

| Gene | Forward primer (5' to 3') | Reverse primer (5' to 3') |
| --- | --- | --- |
| BLNK | TGTCAAGAAGCTAGGTGGCG | GGGCCTCACCAATGCGG |
| MAPK8 | GCTGGTGATAGATGCGTCCAA | TCCTCTATTGTGTGCTCCCTTTC |
| PRKCQ | GGACTCAAGTGTGATGCATGTGG | TAAGCAGCGAGCCTGTTGAGTG |
| TNFSF12 | AGAGAGTGGCGAAGGGTTTG | GAAAACACGTGAACAGGCCC |
| GAPDH | GCAAGGATGCTGGCGTAATG | TACGCGTAGGGGTTTGACAC |
